# Supplementary material for: A cost-effective innovation in anaemia management for paediatric patients with haemodialysis-dependent chronic kidney disease
Source: Springer Nature journal article supplement (doi:10.1007/s00467-025-06680-x), 2025-03-01
Supplement: MOESM1 [file 467_2025_6680_MOESM1_ESM.pdf]

# A cost-effective innovation in anaemia management for paediatric haemodialysis-dependant chronic kidney disease patients

Original  
Article

**AIM:** To establish if IV ferric carboxymaltose is a viable alternative to iron sucrose in paediatric haemodialysis patients

**DESIGN & OUTCOMES:** Retrospective comparative study investigating the efficacy, safety and cost-effectiveness of IV iron therapy in the management of anaemia in paediatric haemodialysis (HD)-dependant kidney failure

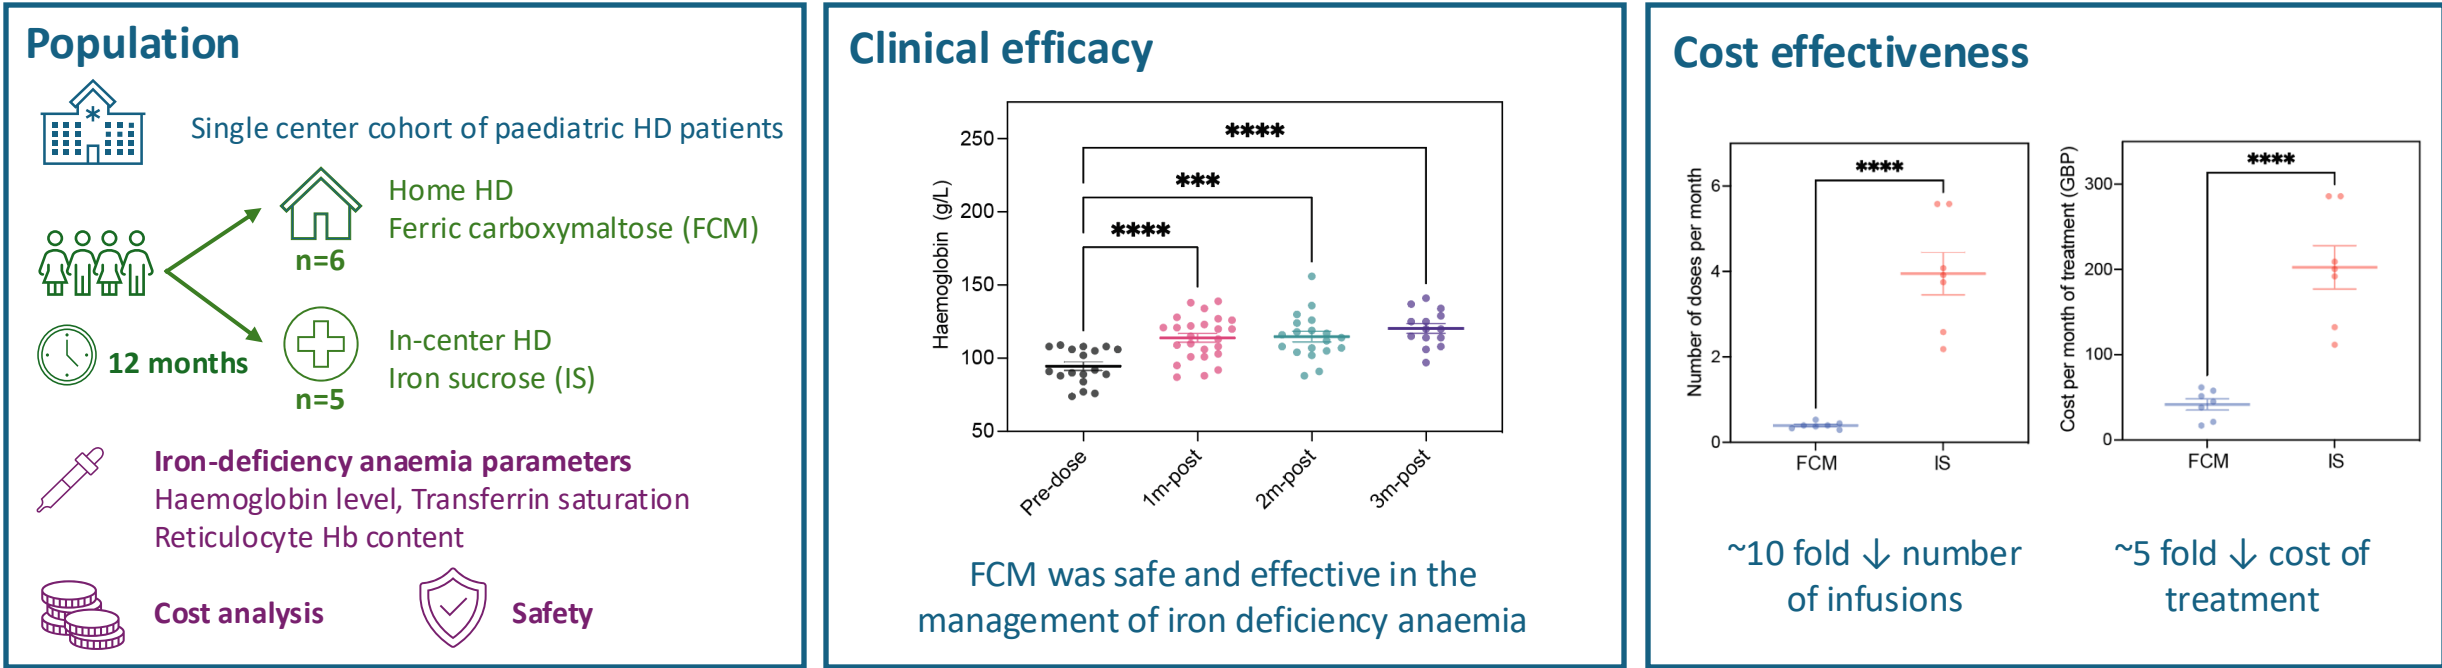

**CONCLUSION:** Ferric carboxymaltose is a safe and and cost-effective option for the management of iron deficiency anaemia and improves healthcare delivery for paediatric haemodialysis patients.

Preston et al. 2024

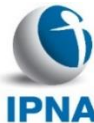

**Pediatric Nephrology**  
Journal of the  
International Pediatric Nephrology Association
